# Supplementary material
Source: publisher site journal article supplement (http://www.degruyter.com/publication/journal_key/MED/downloadAsset/MED_CFP%20Computational%20Intelligence%20Methodologies%20Meets%20Recurrent%20Cancers.pdf)
Supplement: Supplementary file 1 [file MED_CFP%20Computational%20Intelligence%20Methodologies%20Meets%20Recurrent%20Cancers.pdf]

# COMPUTATIONAL INTELLIGENCE METHODOLOGIES MEETS RECURRENT CANCERS – FROM PREDICTION TO PROGNOSIS

## GUEST EDITORS

---

**Chi-Chang Chang**, Chung-Shan Medical University, Taiwan  
**Tetsuya Sakurai**, University of Tsukuba, Japan

## DESCRIPTION

---

All cancers are usually classified further according to the extent or stage of disease so that therapies may be tailored to the particular disease stage. In general, detection of asymptomatic recurrences is associated with prolonged overall survival and survival from the time of initial detection of recurrence. However, the treatments of recurrent cancers are still a tough clinical challenge. When the recurrence is not surgically resectable, and/or suitable for curative radiation, therapeutic options are limited. With such complex situations, it can be difficult to comprehend all options “in our heads”. Medical informatics is an interdisciplinary and scientific field. It deals with develop and apply advanced methods in order to better understand and to improve health care, which via the diagnosis, treatment, and prevention of cancers, illness, injury, and other physical and mental impairments in human beings. This special issue spans theoretical, practical, and technical issues in medical informatics and recurrent cancers. Research on applications of prevention, prediction and prognosis topics are appropriate for this special issue. Practical experiences and experiments in using computational intelligence technologies and medical information technologies are also welcome. We look forward to contributions from academicians, researchers, and educators worldwide.

## HOW TO SUBMIT

---

Please contact Guest Editor **Dr Chi-Chang Chang** [threeec@csmu.edu.tw](mailto:threeec@csmu.edu.tw) and **Managing Editor** ([Magdalena.Wierzchowicka@degruyter.com](mailto:Magdalena.Wierzchowicka@degruyter.com)) to let know, you are going to submit a paper to Topical Issue.
